# Supplementary material for: Identification of m6A Modification Regulated by Dysregulated circRNAs in Decidua of Recurrent Pregnancy Loss
Source: MDPI journal article supplement (doi:10.3390/cimb45110551), 2023-10-31
Supplement: s1 [file s1]

**Figure S1. Categories and length of differentially expressed circRNAs.** (A) categories of differentially expressed circRNAs in decidua between NP group and RPL group. (B) length of differentially expressed circRNAs in decidua between NP group and RPL group.

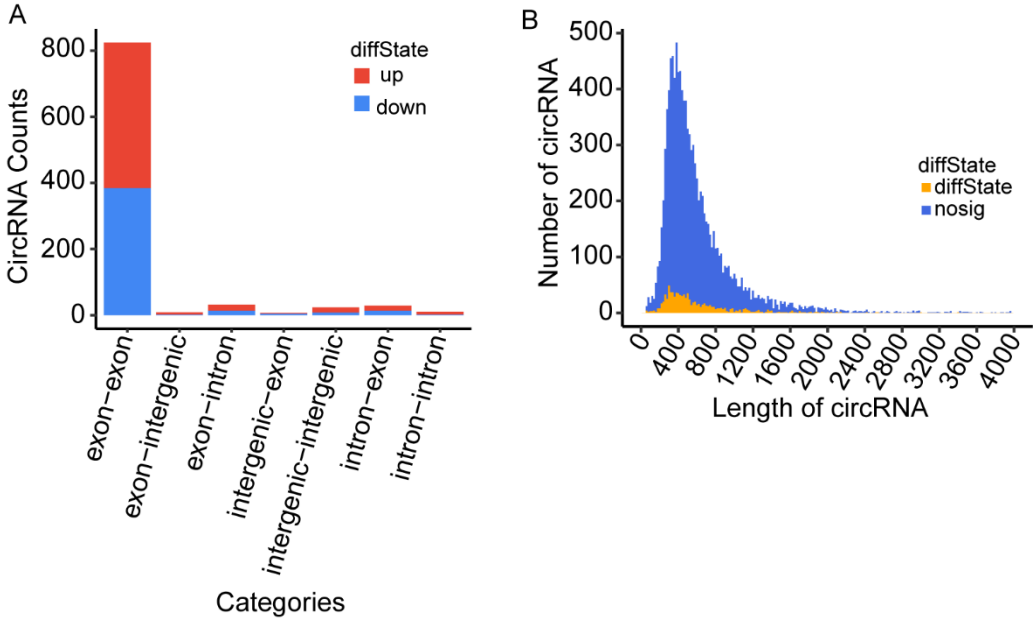

**Table S1. KEGG pathway of parental genes of circRNAs.**

| databas<br>eID | Description                                                         | geneRatio | bgRatio | pvalue | padj   | enrichScore | overlapGeneList                                                   | overlap<br>Gene<br>Count |
|----------------|---------------------------------------------------------------------|-----------|---------|--------|--------|-------------|-------------------------------------------------------------------|--------------------------|
| hsa003<br>10   | Lysine<br>degradation                                               | 9/109     | 63/2426 | 0.0016 | 0.0761 | 3.1795      | ASH1L/PLOD2/PRDM2/SMYD2/<br>DOT1L/SETD2/NSD2/NSD1/EH<br>MT1       | 9                        |
| hsa015<br>21   | EGFR<br>tyrosine<br>kinase<br>inhibitor<br>resistance               | 10/109    | 79/2426 | 0.0023 | 0.0761 | 2.8173      | AKT3/NF1/RPS6KB1/AKT2/PIK3<br>CA/PDGFR/RAF/PLCG2/STAT<br>3/MAP2K2 | 10                       |
| hsa005<br>32   | Glycosamino<br>glycan<br>biosynthesis -<br>chondroitin<br>sulfate / | 4/109     | 20/2426 | 0.0106 | 0.1738 | 4.4513      | CSGALNACT1/CHSY1/XYLT1/C<br>HST12                                 | 4                        |

|          |                               |       |         |        |        |        |                                                          |   |
|----------|-------------------------------|-------|---------|--------|--------|--------|----------------------------------------------------------|---|
|          | dermatan sulfate              |       |         |        |        |        |                                                          |   |
| hsa00670 | One carbon pool by folate     | 4/109 | 20/2426 | 0.0106 | 0.1738 | 4.4513 | GART/MTHFD1L/MTHFD1/MTHFD2L                              | 4 |
| hsa00562 | Inositol phosphate metabolism | 8/109 | 73/2426 | 0.0150 | 0.1960 | 2.4391 | PIK3C3/PIK3CA/PIP5K1A/INPP5B/INPP5A/PI4K2A/PLCG2/PIKFYVE | 8 |
| hsa01522 | Endocrine resistance          | 9/109 | 98/2426 | 0.0294 | 0.3194 | 2.0439 | AKT3/RPS6KB1/AKT2/PIK3CA/BRAF/PTK2/NCOR1/MAP2K2/MAPK10   | 9 |
| hsa01523 | Antifolate resistance         | 4/109 | 31/2426 | 0.0476 | 0.3194 | 2.8718 | CHUK/ABCC1/GART/ABCC5                                    | 4 |
| hsa03015 | mRNA surveillance pathway     | 8/109 | 98/2426 | 0.0700 | 0.5691 | 1.8168 | PPP2R1B/PPP2R5C/PAPOLG/RNGTT/UPF2/DDX19A/PPP2R3A/NCBP1   | 8 |
